# Supplementary material for: Clearance of HIV infection by selective elimination of host cells capable of producing HIV
Source: PubMed Central journal article supplement (PMC7426846; doi:10.1038/s41467-020-17753-w), 2020-08-13
Supplement: 41467_2020_17753_MOESM1_ESM.pdf [file 41467_2020_17753_MOESM1_ESM.pdf]

Supplementary Information for:

**Clearance of HIV Infection by Selective Elimination of Host Cells  
Capable of Producing HIV**

Min Li<sup>1</sup>, Wei Liu<sup>1</sup>, Tonya Bauch<sup>1</sup>, Edward A. Graviss<sup>2</sup>, Roberto C. Arduino<sup>3</sup>,  
Jason T. Kimata<sup>4</sup>, Min Chen<sup>5</sup>, and Jin Wang<sup>1,6\*</sup>

<sup>1</sup>Immunobiology and Transplant Science Center, Houston Methodist Research Institute, Houston, TX 77030, USA

<sup>2</sup>Department of Pathology and Genomic Medicine, Houston Methodist Research Institute, Houston, TX 77030, USA

<sup>3</sup>Division of Infectious Diseases, Department of Internal Medicine, McGovern Medical School at The University of Texas Health Science Center, Houston, TX 77030, USA

<sup>4</sup>Department of Molecular Virology and Microbiology, Baylor College of Medicine, Houston, TX 77030, USA

<sup>5</sup>Department of Pathology and Immunology, Baylor College of Medicine, Houston, TX 77030, USA

<sup>6</sup>Department of Surgery, Weill Cornell Medical College, Cornell University, New York, NY 10065, USA

\*Correspondence: [jinwang@houstonmethodist.org](mailto:jinwang@houstonmethodist.org)

This document includes Supplementary Figures 1-9, and Supplementary Tables 1-3.

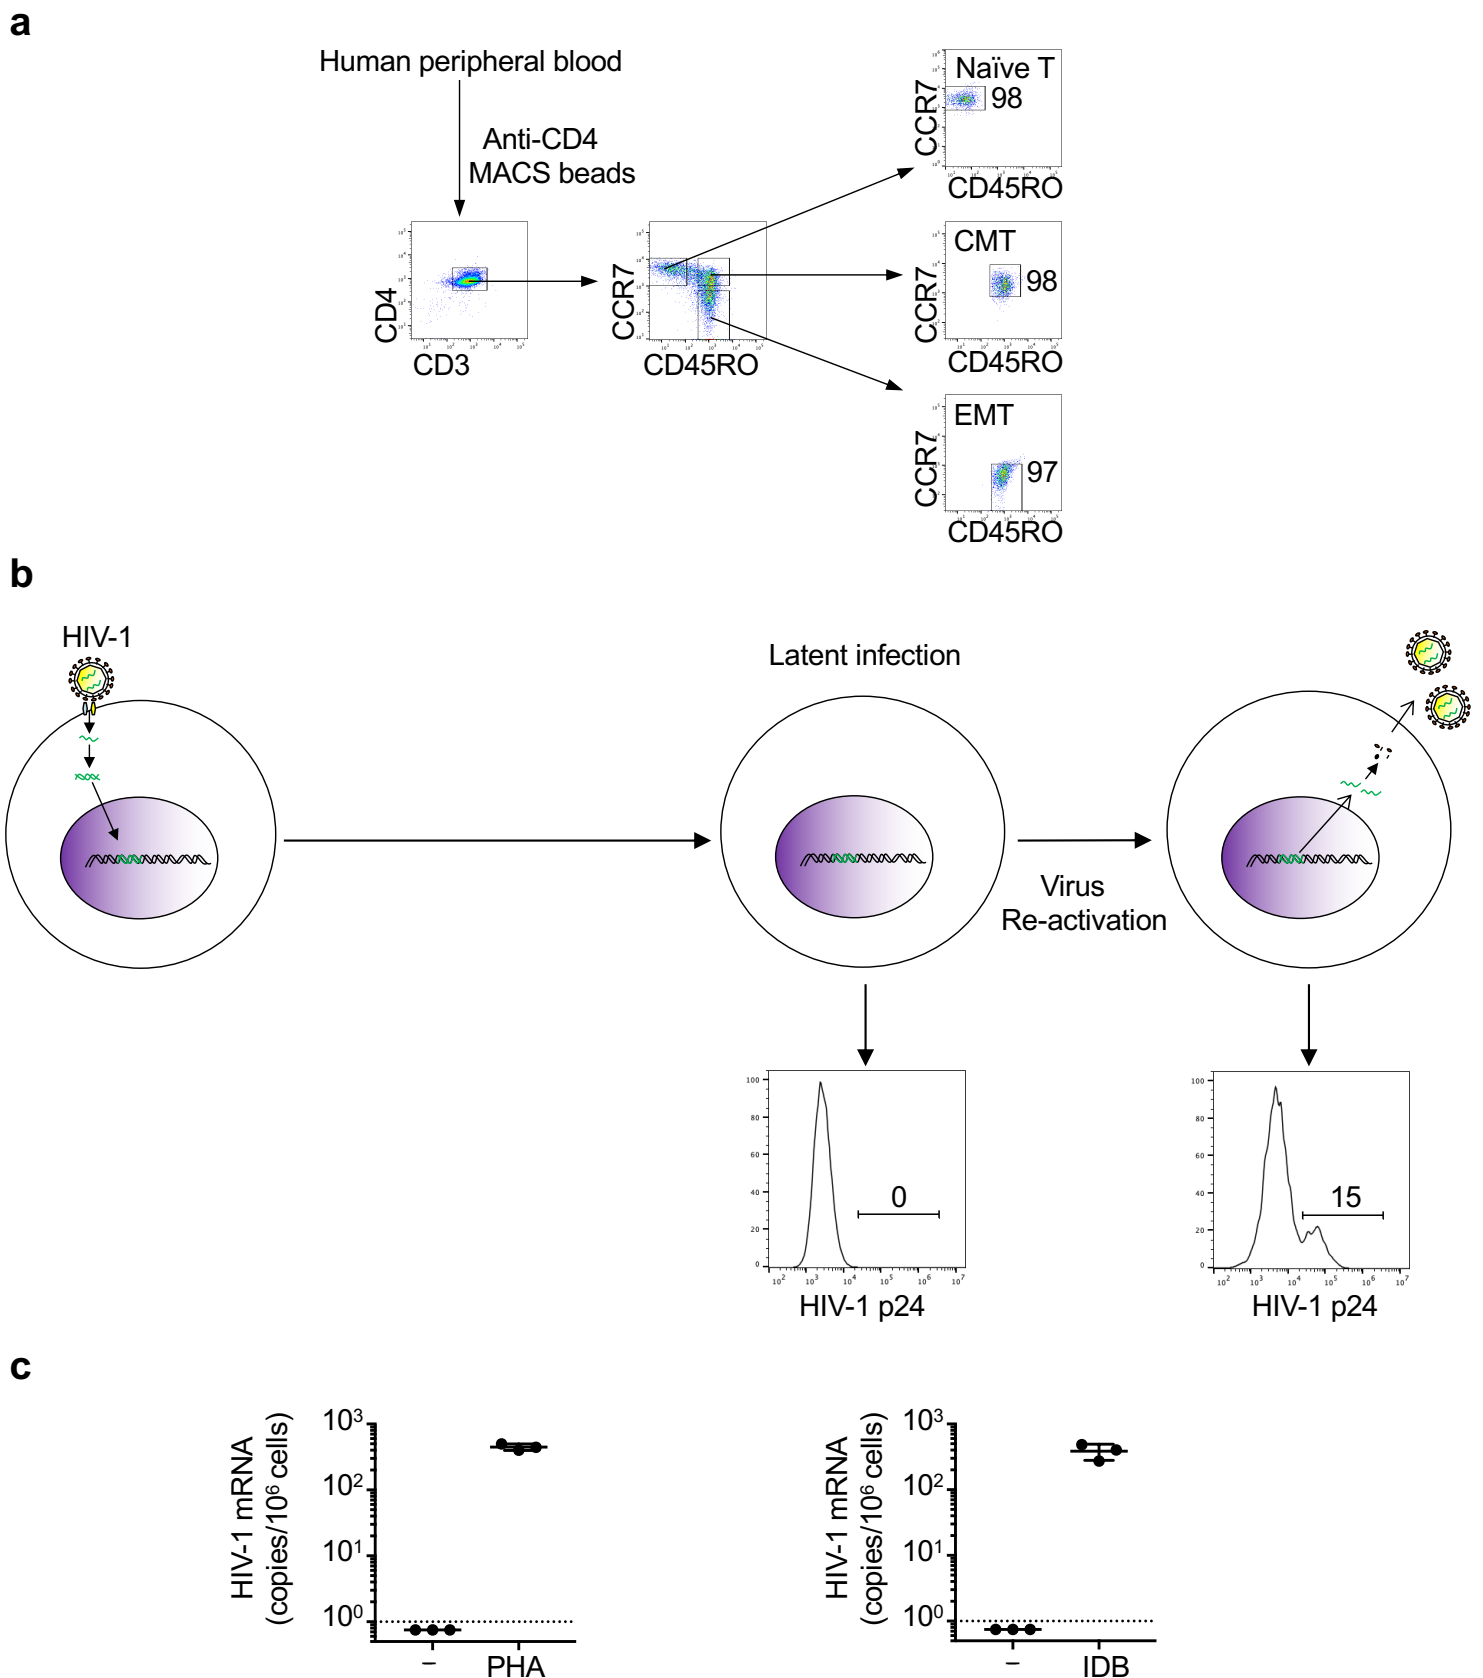

**Supplementary Figure 1. Establishment of HIV-1 latent infection in sorted T cell.**

(a) CD4<sup>+</sup> T cells were purified from human PBMCs using anti-CD4-MACS beads (Miltenyi Biotec). CD3<sup>+</sup>CD4<sup>+</sup>CD45RA<sup>+</sup>CD45RO<sup>-</sup>CCR7<sup>+</sup> naïve T cells, CD3<sup>+</sup>CD4<sup>+</sup>CD45RA<sup>-</sup>CD45RO<sup>+</sup>CCR7<sup>+</sup> central memory T cells (CMT) and CD3<sup>+</sup>CD4<sup>+</sup>CD45RA<sup>-</sup>CD45RO<sup>+</sup>CCR7<sup>-</sup> effector memory T cells (EMT) were sorted by flow cytometry.

(b) CMT were infected with HIV-1 and cultured for 4 days with CCL19 to establish latent infections. Latently infected cells were stimulated with PHA for virus reactivation, followed by intracellular staining for HIV-1 p24.

(c) Latently infected cells were stimulated with PHA or IDB for virus reactivation, followed by RT-PCR analyses. Data are presented as mean  $\pm$  SD ( $n = 3$  biologically independent samples). The dash line indicates detection limit. Source data are provided as a Source Data file.

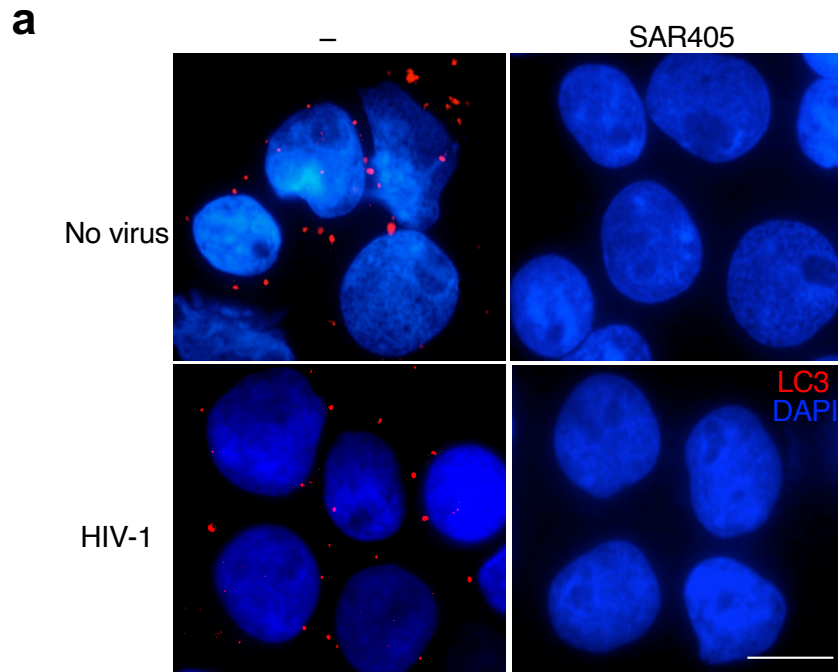

**b**

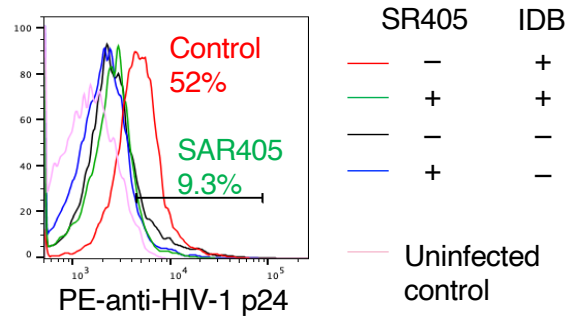

**Supplementary Figure 2. Inhibition of autophagy in HIV-1-infected T cells.**

(a) CMT with or without HIV-1 infection as in Fig. 1 were cultured with or without SAR405 for 12 h, following by immunocytochemistry staining for LC3. The images are representative of two independent experiments. Scale bar, 10  $\mu$ m.

(b) CMT were infected with HIV-1 AD8 (1 MOI). The cells were cultured with CCL19 in the presence or absence of SAR405 for 4 days. The cells were then cultured with or without IDB for 24 h, followed by intracellular staining for HIV-1 p24 and flow cytometry. Percentages of HIV-1 p24<sup>+</sup> cells are shown.

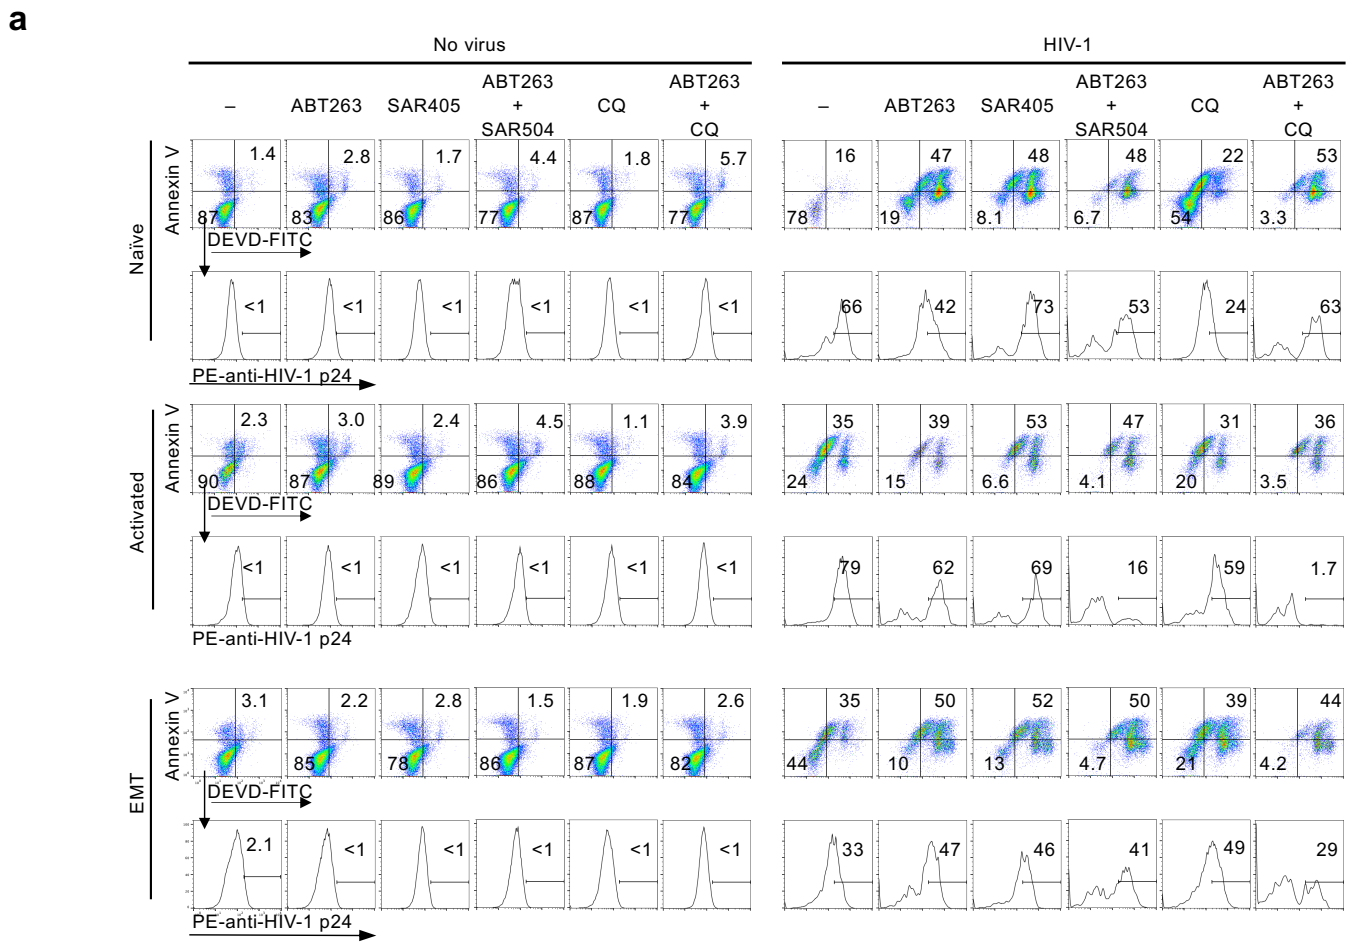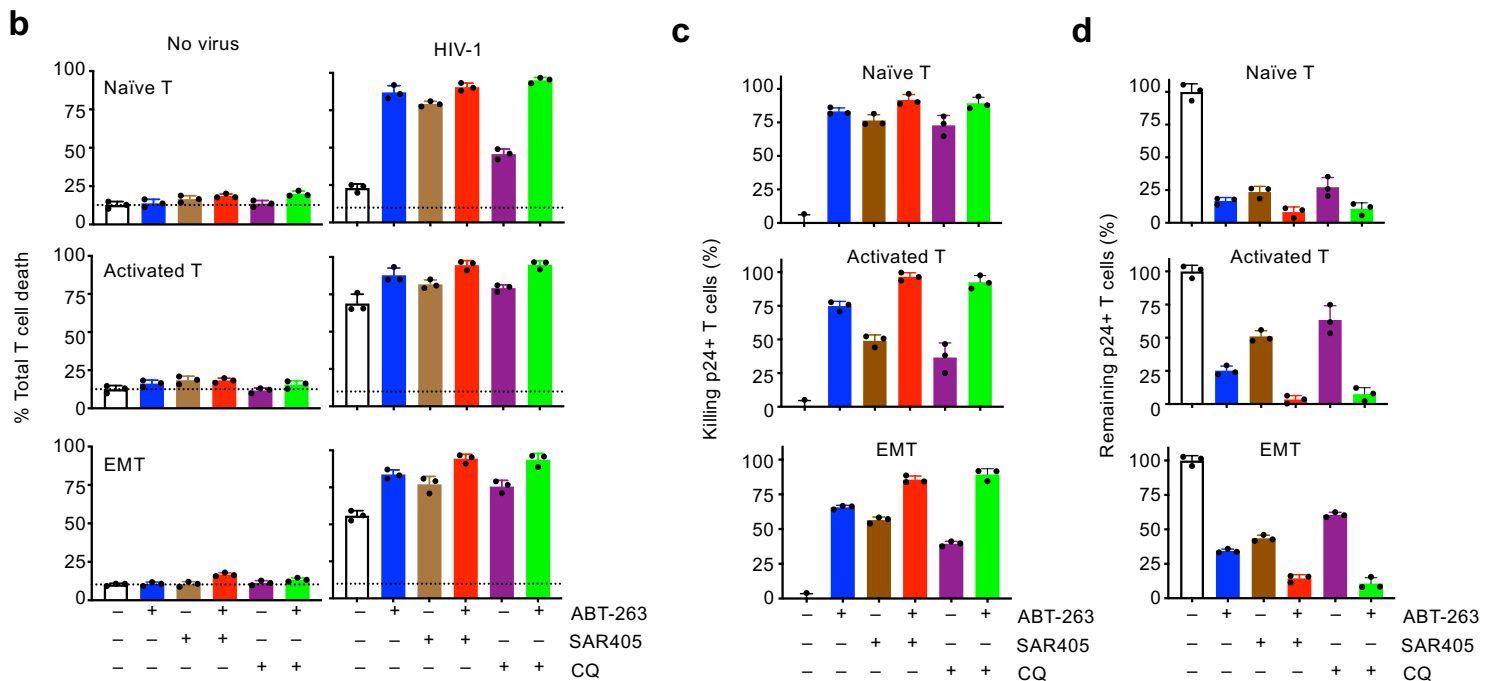

**Supplementary Figure 3. Induction of cell death in T cells with or without HIV-1 infections.**

(a) Naïve T cells, activated T cells, or EMT with or without infection by HIV-1 (NL4-3, 1 MOI) were cultured for 4 days to establish latency as in Fig. 1. The cells were stimulated with 0.1  $\mu$ M IDB. ABT-263 (0.2  $\mu$ M), SAR405 (2  $\mu$ M) and chloroquine (CQ, 10  $\mu$ M) were added in different samples as indicated. The cells were cultured for 48 h. The cells were then incubated with DEVD-FITC, followed by staining with APC-Annexin V and intracellular staining with PE-anti-HIV p24. The cells were analyzed by flow cytometry.

(b) Percentage of cell death among all T cells.

(c) Percentage of killing of HIV-1 p24<sup>+</sup> T cells by indicated combination of agents after IDB-induced virus reactivation.

(d) Percentage of remaining HIV-1 p24<sup>+</sup> viable T cells negative for DEVD-FITC and Annexin V staining after treatments by indicated combinations of ABT-263 and SAR405 or CQ compared to untreated controls.

In b, c and d, data are representative of three biologically independent samples and presented as mean  $\pm$  SD.

Source data are provided as a Source Data file.

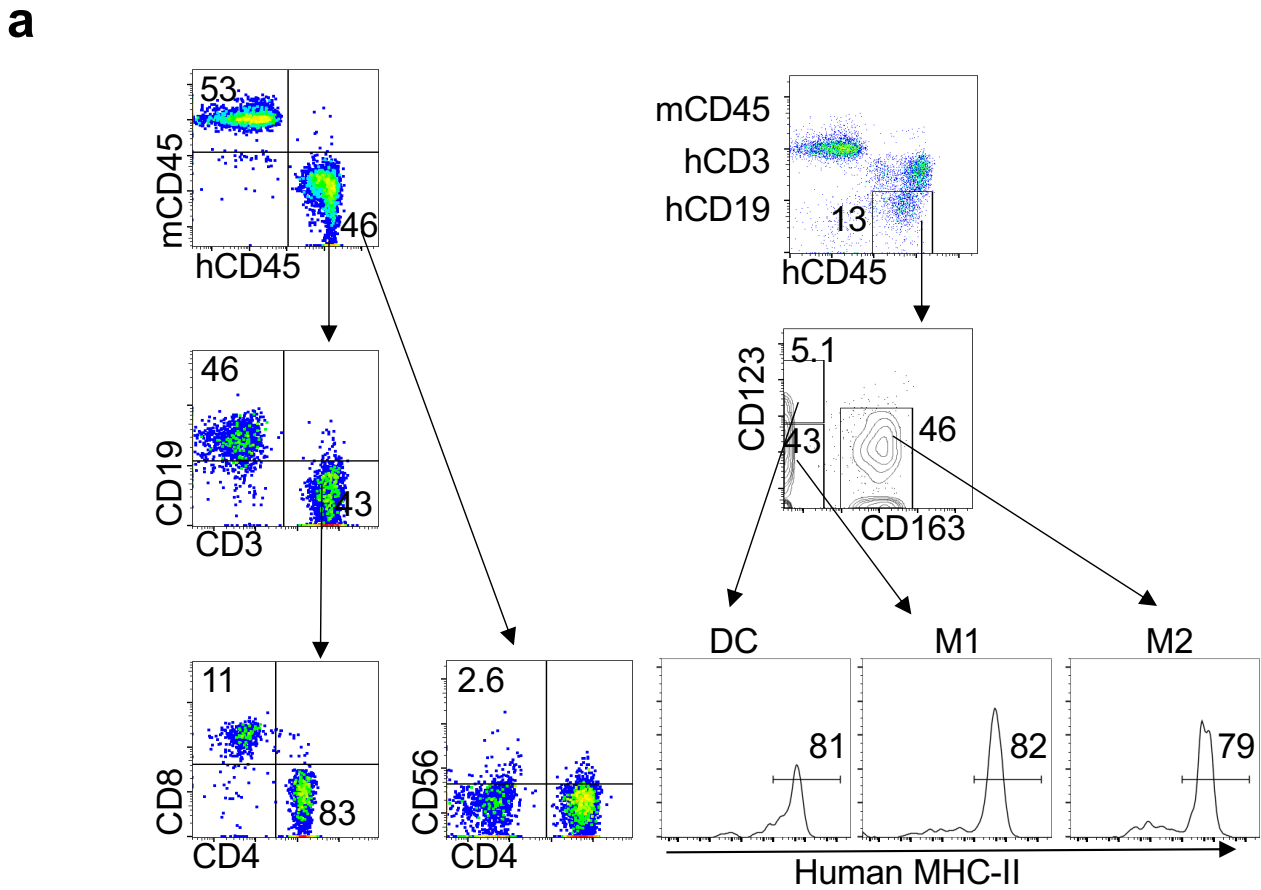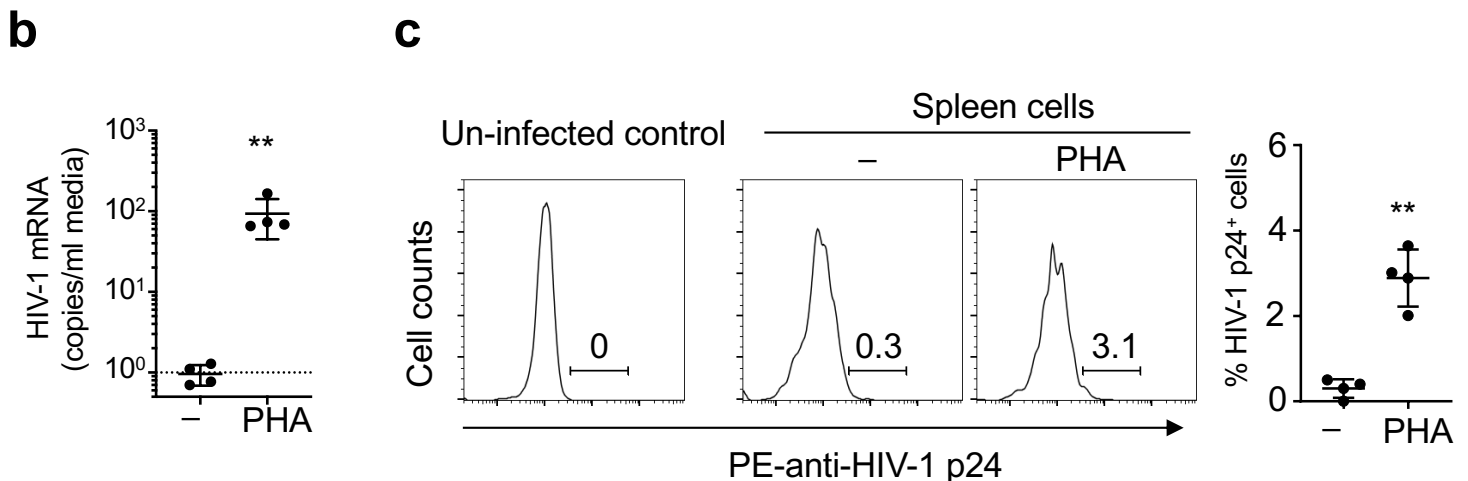

**Supplementary Figure 4. Analyses of Hu-HSC mice by flow cytometry.**

**(a)** Flow cytometry analyses of immune cells in the peripheral blood of Hu-HSC mice. NK, nature killer cells; DC, dendritic cells; M1, M1 macrophages; M2, M2 macrophages.

**(b)** Spleen cells were isolated from Hu-HSC mice ( $n = 4$ ) 10 days post HIV-1 infection and cultured with or without PHA for 24 h. Culture media were collected for HIV-1 mRNA determination by RT-PCR. Data are presented as mean  $\pm$  SD. PHA vs. control, \*\* $p = 0.0088$  (unpaired two-tailed  $t$  test).

**(c)** Spleen cells treated in (b) were stained for CD4, followed by intracellular staining of HIV-1 p24 and flow cytometry analysis. Increases in p24<sup>+</sup> cells after PHA stimulation suggest that HIV-1 infections in some cells have established latency. Data are presented as mean  $\pm$  SD. PHA vs. control, \*\* $p = 0.0003$  (unpaired two-tailed  $t$  test).

Source data are provided as a Source Data file.

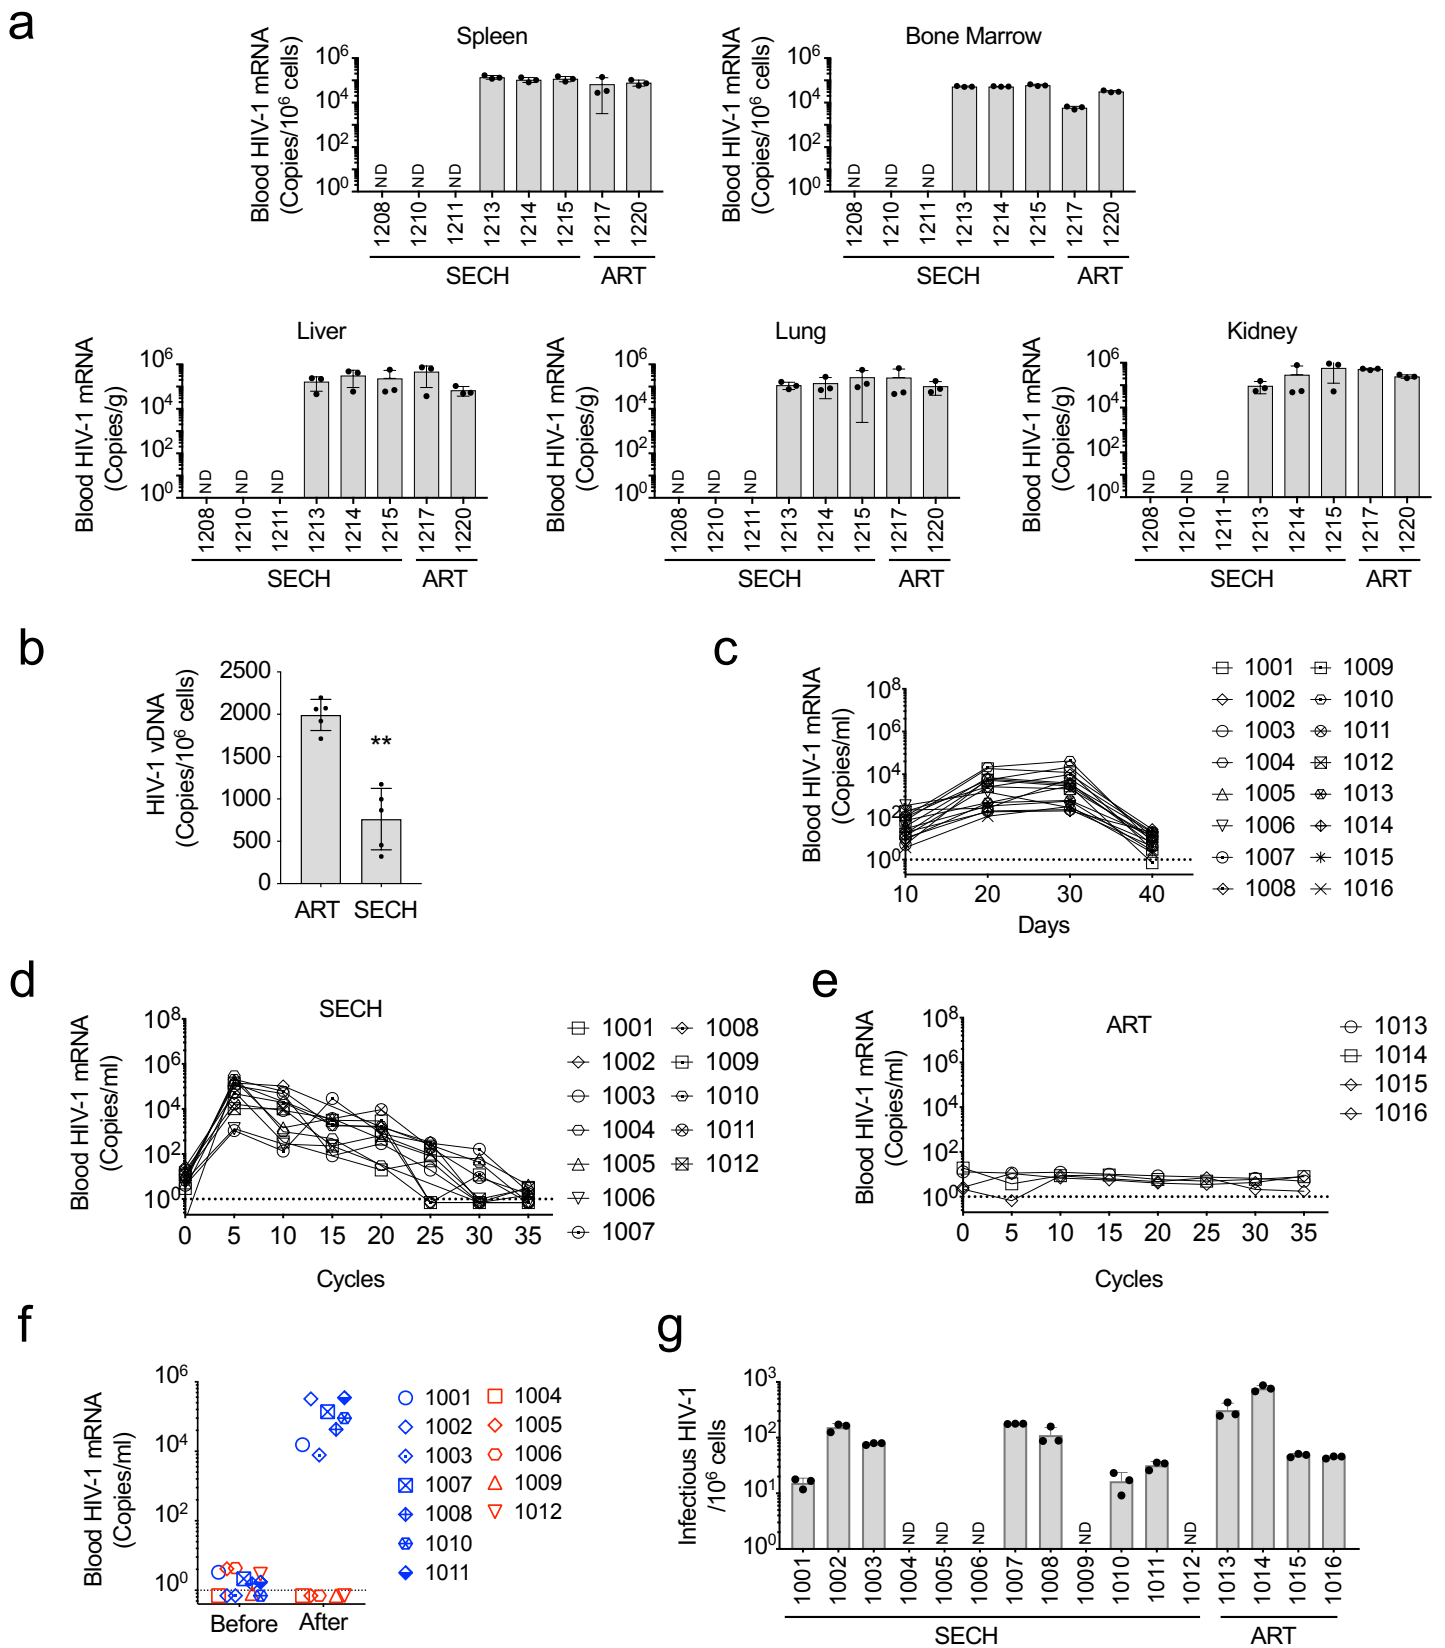

**Supplementary Figure 5. SECH treatment in HIV-1-infected Hu-HSC mice.**

**(a)** Detection of HIV-1 mRNA in tissues and organs from mice after treatments by SECH or ART.

**(b)** Determination of HIV-1 genomic DNA in spleen from mice after treatments by SECH ( $n = 5$ ) or ART ( $n = 5$ ). Data are presented as mean  $\pm$  SD. SECH vs. ART:  $**p = 0.0001$  (unpaired two-tailed  $t$  test).

**(c)** HIV-1 mRNA in the total peripheral blood was determined by RT-PCR prior to SECH treatment. The dash line indicates detection limit.

**(d,e)** HIV-1 mRNA in the total peripheral blood was determined by RT-PCR after SECH (d) or ART (e) treatment.

**(f)** HIV-1 mRNA in the peripheral blood of HIV-1-infected Hu-HSC mice after withdrawal of treatments for 4 weeks.

**(g)** Infectious HIV-1 in the spleen of mice in (f) was determined by TZA assays. ND, not detectable.

In a and g, biological samples were measured in three technical replicates and data are presented as mean  $\pm$  SD. Source data are provided as a Source Data file.

**a**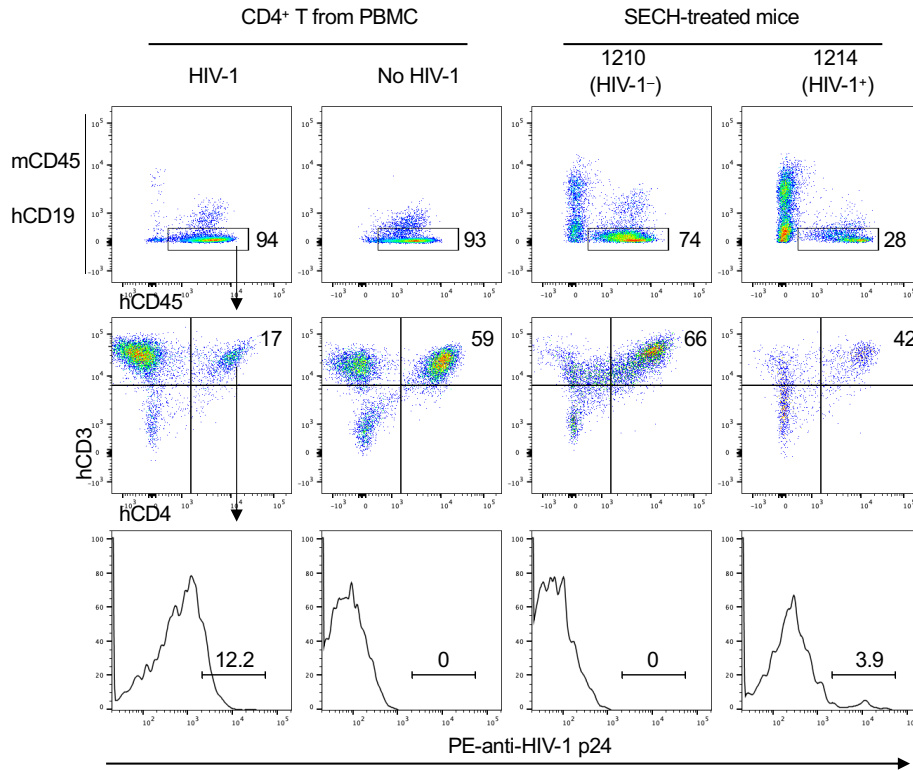**b**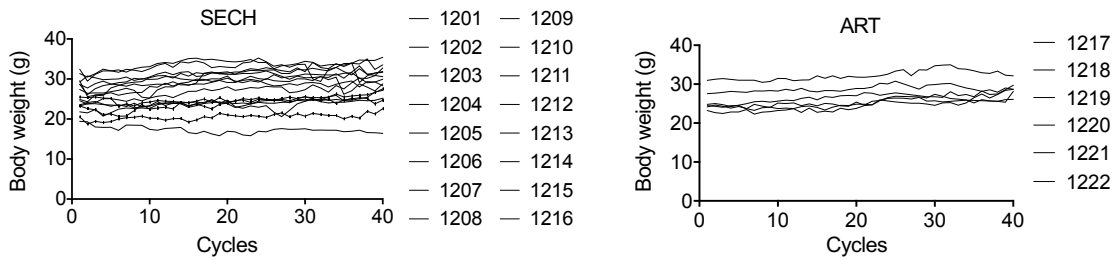**c**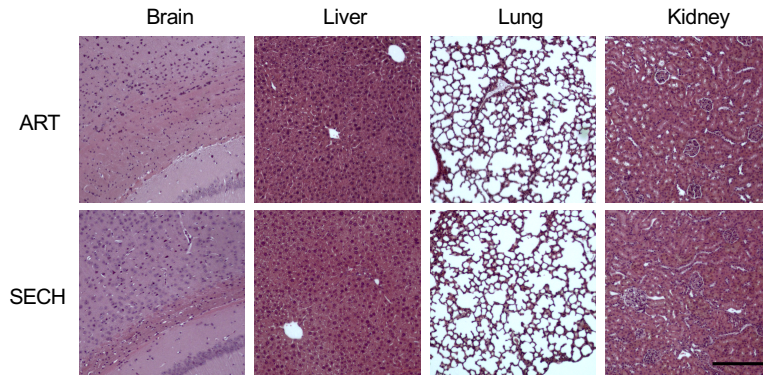**Supplementary Figure 6. Analyses of Hu-HSC mice treat by SECH or ART.**

(a) Detection of HIV-1 p24 in T cells from Hu-HSC mice after SECH treatments. Spleen cells of SECH-treated mice were stimulated with PHA plus LPS and CpG. mCD45<sup>+</sup>hCD19<sup>+</sup>hCD45<sup>+</sup>CD3<sup>+</sup>CD4<sup>+</sup> human CD4 T cells were gated to determine p24 staining. Human PBMC CD4<sup>+</sup> T cells with or without HIV-1 infection were used as controls.

(b) Mouse body weight during SECH treatment in Figures 3 and 4.

(c) H&E staining of tissue sections from HIV-infected Hu-HSC mice treated by ART or SECH (representative of 4 independent experiments). Scale bar: 200  $\mu$ m.

Source data are provided as a Source Data file.

**a**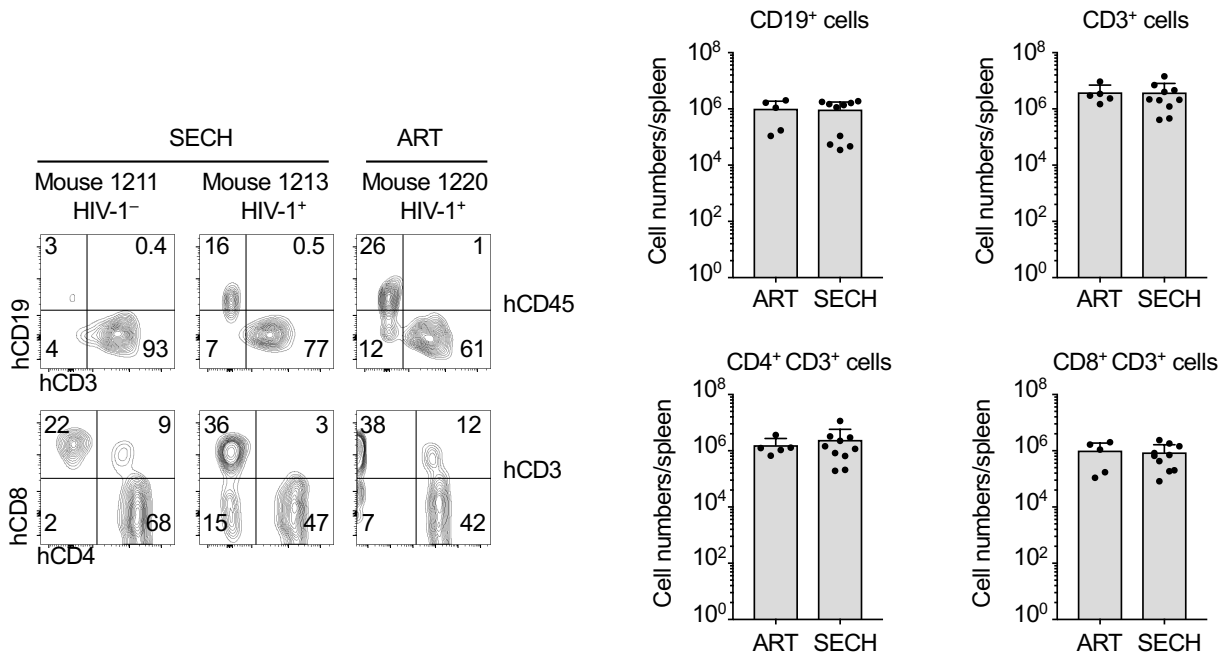**b**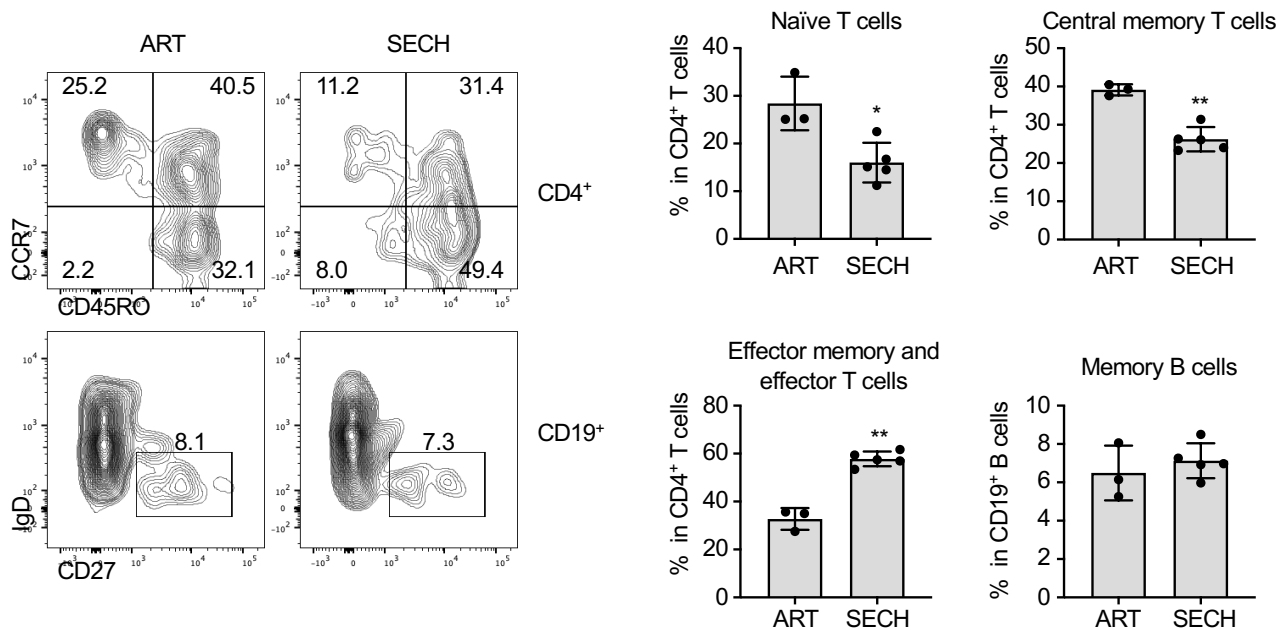

### Supplementary Figure 7. Analyses of Hu-HSC mice treated by SECH or ART.

(a) HIV-1-infected Hu-HSC mice were treated by SECH or ART for 40 cycles. After withdrawal of treatments, the types of immune cells from the spleen were determined by flow cytometry (left panel). The number of immune cells in the spleen were shown in right panel (ART,  $n = 5$ ; SECH,  $n = 10$ ). Data are presented as mean  $\pm$  SD.

(b) HIV-1-infected Hu-HSC mice were treated by SECH or ART for 40 cycles. After withdrawal of treatments, immune memory cells from the spleen were determined flow cytometry (left panel). CCR7<sup>+</sup>CCD45RO<sup>-</sup> naïve T cells, CCR7<sup>+</sup>CCD45RO<sup>+</sup> central memory T cells, CCR7<sup>-</sup>CCD45RO<sup>+</sup> effector memory T cells and CCR7<sup>-</sup>CCD45RO<sup>-</sup> effector T cells and CD19<sup>+</sup>CD27<sup>+</sup> memory B cells were quantified (right panel). Data are presented as mean  $\pm$  SD. SECH ( $n = 5$ ) vs. ART ( $n = 3$ ):  $p = 0.0111$  (Naïve T), 0.0006 (Central memory T cells), 0.0111 (Effector and effector memory T) and 0.4627 (Memory B cells) as determined by unpaired two-tailed  $t$  test.

Source data are provided as a Source Data file.



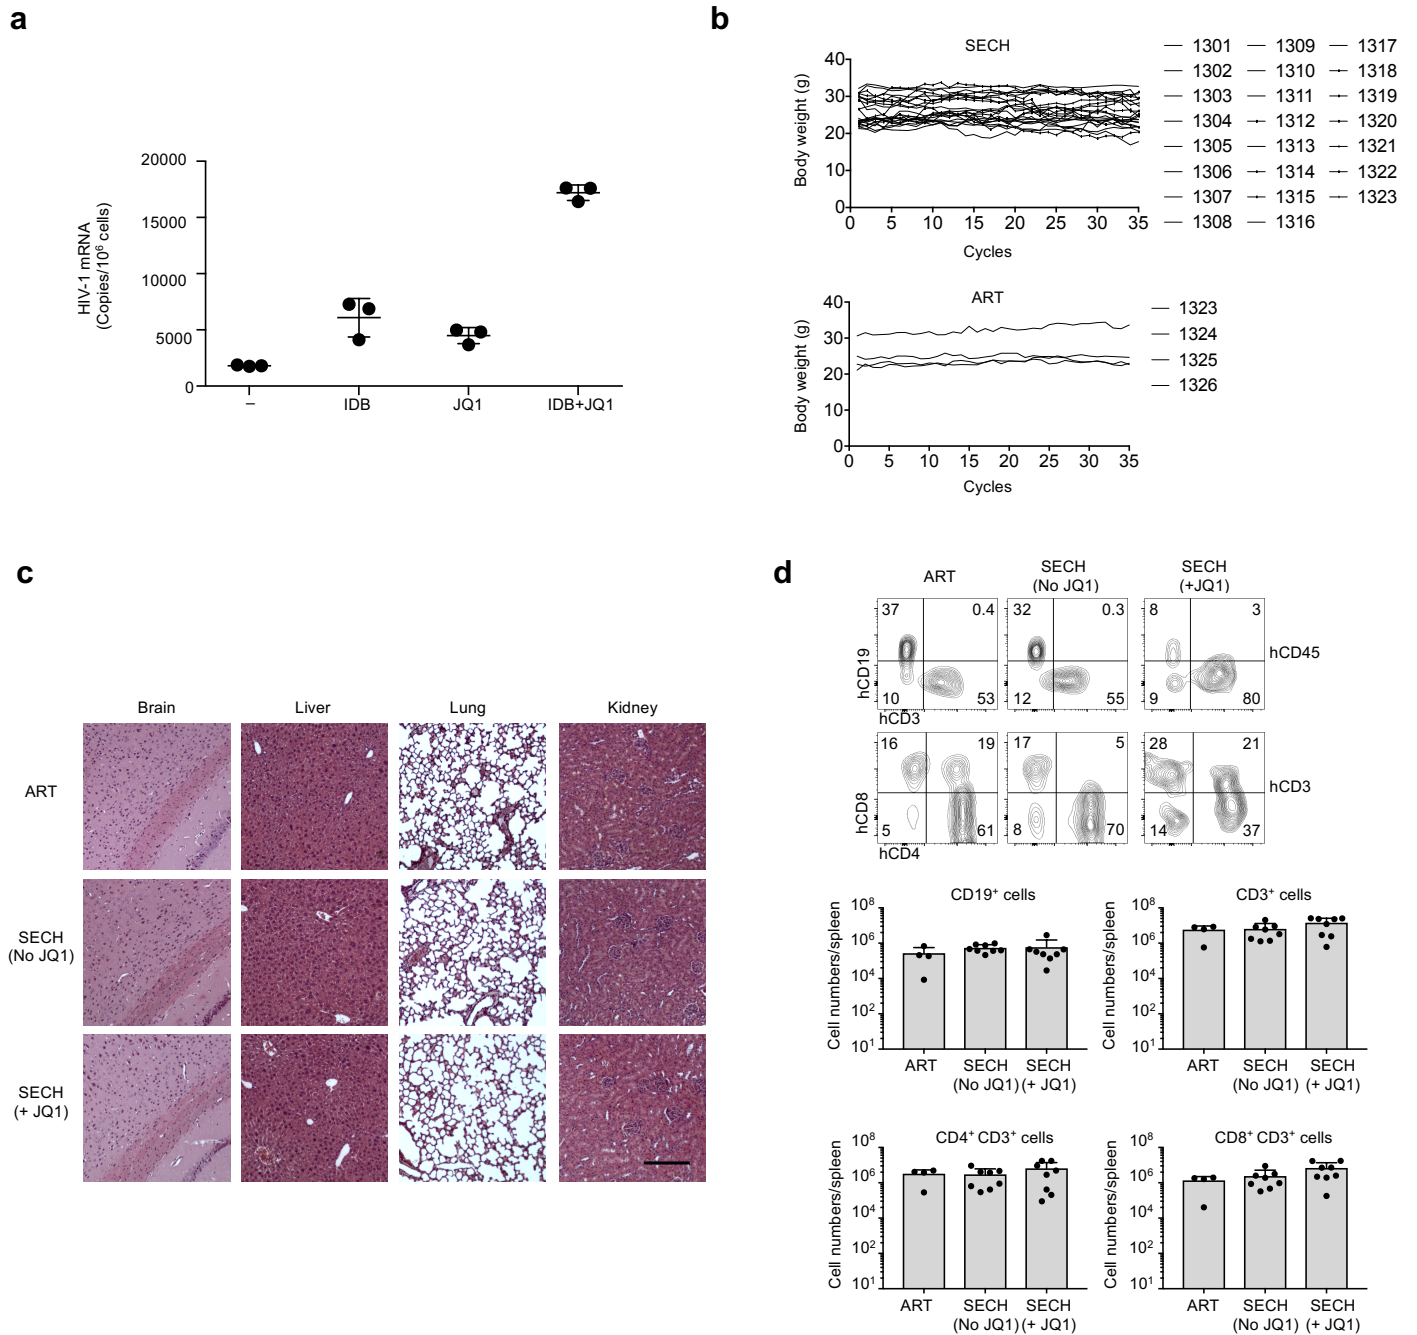

**Supplementary Figure 8. SECH treatment in HIV-1-infected Hu-HSC mice.**

(a) Latently infected CD4 T cells were cultured with IDB, JQ1 or both for 24 h. HIV-1 mRNA was measured by RT-PCR. Data are presented as mean  $\pm$  SD ( $n = 3$  biologically independent samples).

(b) Mouse body weight during SECH treatments in Figure 5.

(c) H&E staining of tissue sections from HIV-infected Hu-HSC mice treated by ART or SECH. Data are representative of 4 independent experiments. Scale bar: 200  $\mu$ m.

(d) Flow cytometry analyses of immune cells in the spleen of Hu-HSC mice treated by ART ( $n = 4$ ), SECH ( $n = 8$ ) or SECH+JQ1 ( $n = 8$ ). Data are presented as mean  $\pm$  SD.

Source data are provided as a Source Data file.

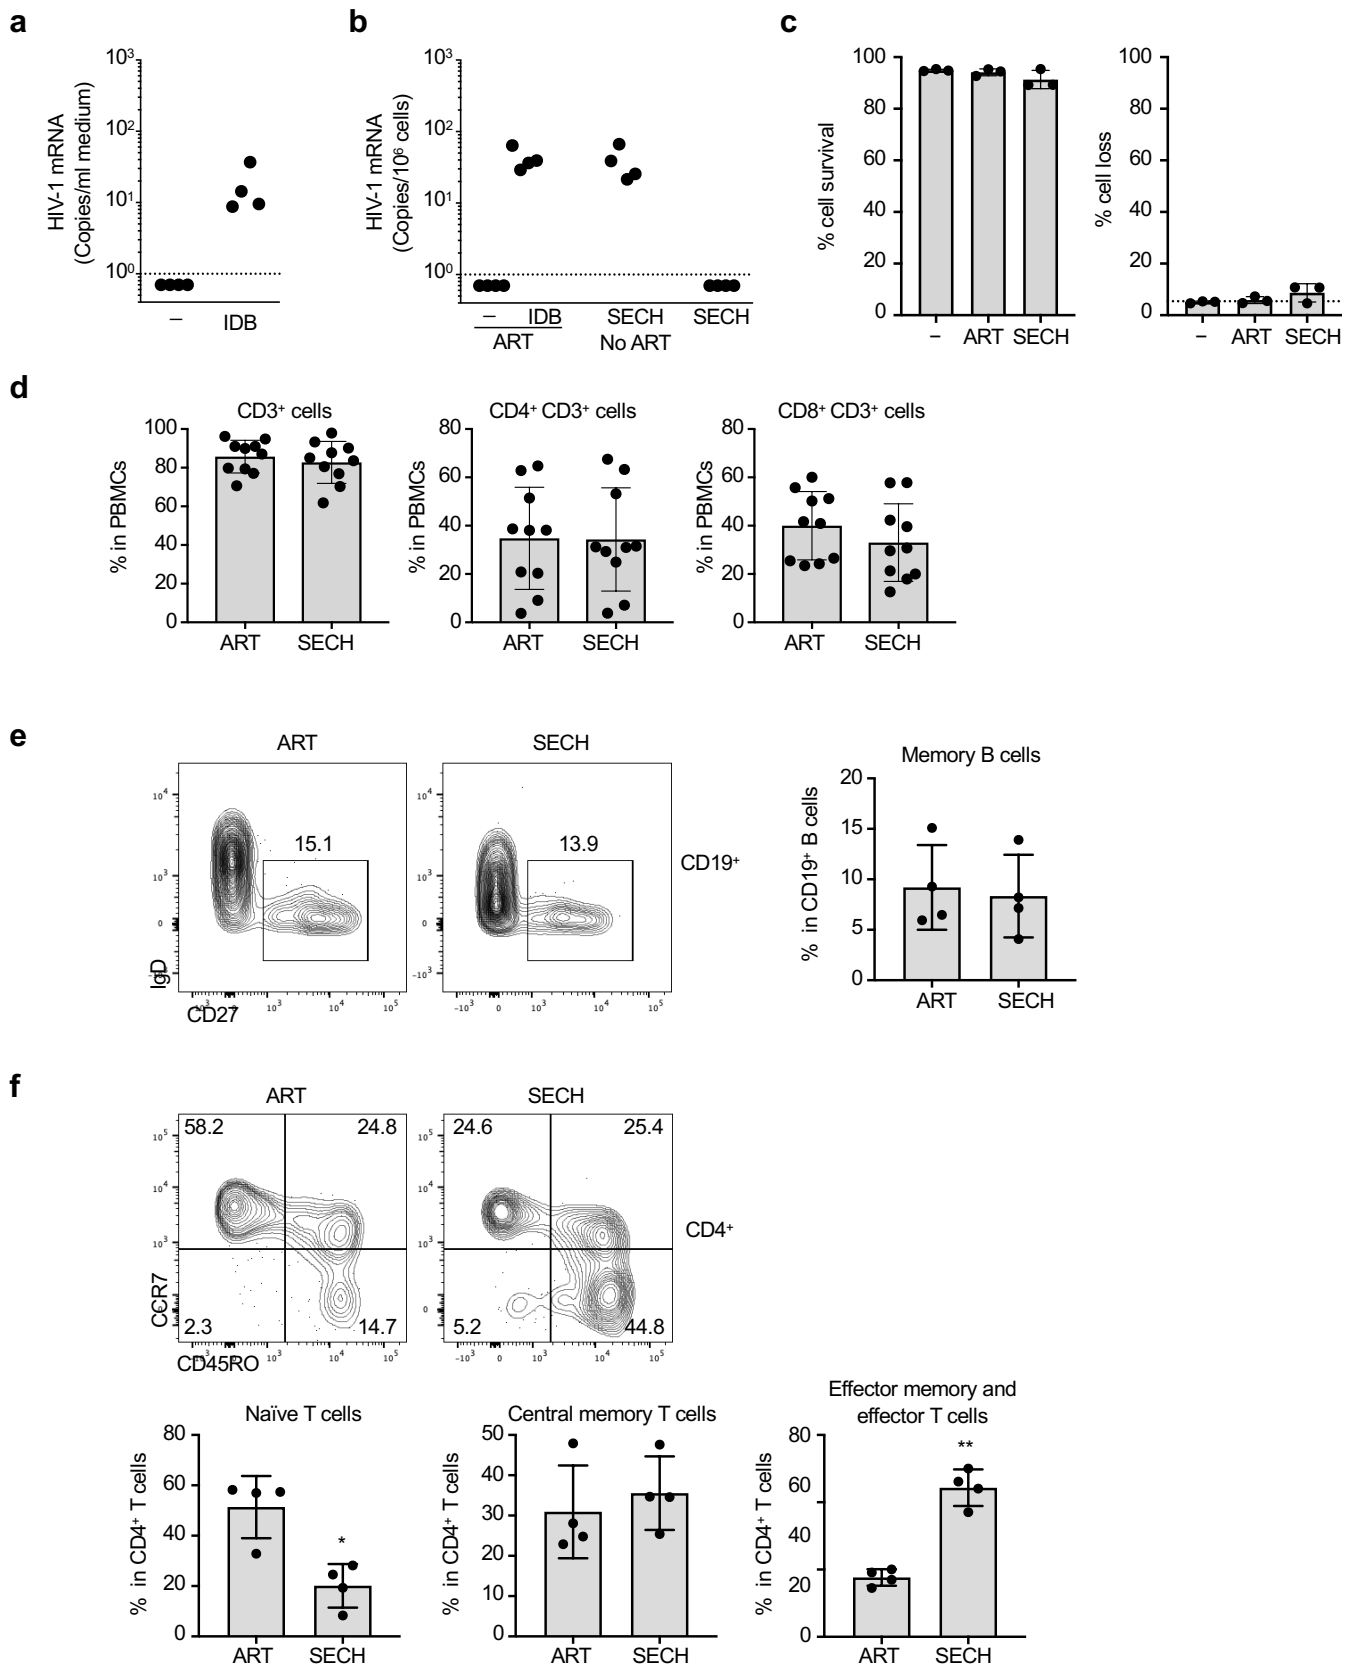

**Supplementary Figure 9. SECH treatment in patient samples.**

(a) Determination of HIV-1 mRNA in culture media from PBMCs of ART-treated patients ( $n=4$ ) by pol RT-PCR.

(b) PBMCs of ART-treated patients were treated by ART, SECH, SECH without antiviral drugs, respectively, for 7 cycles, cell associated HIV-1 mRNA was determined by pol RT-PCR.

(c) The percentage of cell survival and loss of live cells after one cycle of treatments by SECH or ART ( $n=3$  biologically independent samples). Data are presented as mean  $\pm$  SD.

(d) The percentage of immune cells in PBMCs from ART-treated patients after treatment with ART or SECH ( $n=10$  patients). Data are presented as mean  $\pm$  SD.

(e) CD19<sup>+</sup>IgD<sup>-</sup>CD27<sup>+</sup> memory B cells in PBMCs from HIV-1<sup>+</sup> patients ( $n=4$ ) after 1 cycle of treatment by ART or SECH. Data are presented as mean  $\pm$  SD.

(f) PBMCs purified from HIV-1<sup>+</sup> patients ( $n=4$ ) were treated by SECH or ART for 7 cycles. T cells were determined by flow cytometry. Data are presented as mean  $\pm$  SD. SECH vs. ART:  $p=0.0060$  (Naïve T cells), 0.5502 (Central memory T cells) and 0.0001 (Effector memory and effector T cells) as determined by unpaired two-tailed  $t$  test.

Source data are provided as a Source Data file.

**Supplementary Table 1. HIV-1-infected Hu-HSC mice used for SECH treatments.**

| Mouse ID | SEX    | Treatment | %<br>mCD45 | %<br>hCD45 | hCD45+  |      |     | hCD45+ |      | hCD45+CD3-CD19- |      |      | HIV-1 detection       |      |       |                  |
|----------|--------|-----------|------------|------------|---------|------|-----|--------|------|-----------------|------|------|-----------------------|------|-------|------------------|
|          |        |           |            |            | %B cell | %CD3 | %NK | %CD4   | %CD8 | %DC             | %M1  | %M2  | Withdrawl<br>(RT-PCR) | TZA  | hmVOA | HIV<br>clearance |
| 1201     | Male   | SECH      | 61.1       | 36.3       | 79.9    | 14.2 | 1.0 | 9.3    | 3.8  | 1.3             | 47.0 | 32.9 | HIV-                  | HIV- | HIV-  | HIV-             |
| 1202     | Male   | SECH      | 51.6       | 44.8       | 78.0    | 12.2 | 1.6 | 9.2    | 2.3  | 1.8             | 52.6 | 30.2 | HIV-                  | HIV- | HIV-  | HIV-             |
| 1203     | Male   | SECH      | 75.5       | 22.6       | 85.0    | 8.5  | 1.0 | 7.0    | 1.2  | 0.8             | 51.7 | 35.2 | HIV-                  | HIV- | HIV-  | HIV-             |
| 1204     | Male   | SECH      | 63.4       | 36.1       | 15.9    | 76.4 | 1.7 | 65.9   | 4.1  | 1.3             | 20.8 | 21.8 | HIV+                  | HIV+ | HIV+  | Not cleared      |
| 1205     | Male   | SECH      | 72.4       | 25.5       | 14.6    | 82.9 | 0.5 | 76.2   | 5.0  | 2.0             | 26.0 | 30.0 | HIV-                  | HIV- | HIV-  | HIV-             |
| 1206     | Male   | SECH      | 73.0       | 27.0       | 33.7    | 57.1 | 1.3 | 47.9   | 6.1  | 0.0             | 32.0 | 52.0 | HIV-                  | HIV- | HIV-  | HIV-             |
| 1207     | Male   | SECH      | 86.0       | 13.6       | 36.3    | 55.9 | 1.1 | 48.1   | 5.8  | 2.9             | 34.9 | 39.0 | HIV+                  | HIV+ | HIV+  | Not cleared      |
| 1208     | Male   | SECH      | 79.0       | 20.2       | 15.0    | 78.7 | 0.7 | 63.9   | 9.8  | 2.3             | 31.8 | 36.3 | HIV-                  | HIV- | HIV-  | HIV-             |
| 1209     | Male   | SECH      | 88.7       | 11.3       | 40.9    | 51.9 | 3.7 | 48.0   | 2.6  | 3.9             | 34.8 | 48.3 | HIV+                  | HIV+ | HIV+  | Not cleared      |
| 1210     | Female | SECH      | 60.2       | 37.7       | 37.9    | 56.4 | 0.9 | 42.8   | 11.9 | 1.8             | 38.7 | 45.8 | HIV-                  | HIV- | HIV-  | HIV-             |
| 1211     | Female | SECH      | 72.5       | 25.7       | 37.0    | 55.3 | 1.3 | 44.6   | 9.6  | 3.8             | 44.3 | 42.4 | HIV-                  | HIV- | HIV-  | HIV-             |
| 1212     | Female | SECH      | 41.8       | 56.4       | 50.2    | 44.6 | 1.3 | 33.5   | 4.5  | 4.5             | 35.8 | 36.9 | HIV+                  | HIV+ | HIV+  | Not cleared      |
| 1213     | Female | SECH      | 41.6       | 42.0       | 22.6    | 72.7 | 1.6 | 50.0   | 8.4  | 4.4             | 29.4 | 35.2 | HIV+                  | HIV+ | HIV+  | Not cleared      |
| 1214     | Female | SECH      | 30.0       | 62.8       | 52.9    | 42.4 | 1.2 | 37.1   | 4.0  | 5.2             | 36.1 | 37.7 | HIV+                  | HIV+ | HIV+  | Not cleared      |
| 1215     | Female | SECH      | 57.1       | 41.5       | 50.4    | 42.6 | 2.2 | 35.4   | 4.3  | 4.9             | 31.4 | 33.8 | HIV+                  | HIV+ | HIV+  | Not cleared      |
| 1216     | Female | SECH      | 64.1       | 35.0       | 51.3    | 42.3 | 1.5 | 27.6   | 12.4 | 9.0             | 37.3 | 34.9 | N/A                   | HIV- | N/A   | HIV-             |
| 1217     | Male   | pART      | 61.4       | 38.6       | 1.6     | 97.8 | 0.2 | 86.4   | 8.9  | 4.3             | 6.4  | 5.0  | HIV+                  | HIV+ | HIV+  | Not cleared      |
| 1218     | Female | pART      | 78.9       | 21.1       | 42.7    | 55.3 | 2.0 | 30.1   | 25.2 | 4.6             | 37.9 | 46.5 | HIV+                  | HIV+ | HIV+  | Not cleared      |
| 1219     | Female | pART      | 52.9       | 34.7       | 53.2    | 39.5 | 1.4 | 24.7   | 13.3 | 6.6             | 39.6 | 38.7 | HIV+                  | HIV+ | HIV+  | Not cleared      |
| 1220     | Female | pART      | 77.9       | 22.0       | 33.0    | 58.9 | 1.3 | 26.4   | 32.5 | 3.9             | 36.9 | 46.0 | HIV+                  | HIV+ | HIV+  | Not cleared      |
| 1221     | Female | pART      | 44.5       | 49.5       | 21.7    | 72.3 | 1.0 | 59.4   | 7.7  | 1.4             | 32.2 | 34.6 | HIV+                  | HIV+ | HIV+  | Not cleared      |
| 1222     | Male   | pART      | 75.2       | 21.5       | 58.5    | 29.1 | 3.0 | 23.4   | 5.0  | 5.9             | 29.4 | 35.3 | N/A                   | HIV+ | N/A   | Not cleared      |
|          |        | Average   | 64.0       | 33.0       | 41.5    | 52.1 | 1.4 | 40.8   | 8.6  | 3.5             | 34.9 | 36.3 |                       |      |       |                  |
|          |        | SD        | 15.6       | 13.3       | 22.0    | 23.1 | 0.8 | 21.1   | 7.5  | 2.2             | 9.9  | 9.8  |                       |      |       |                  |

**Supplementary Table 2. Testing of HIV-1 infections and treatment using Hu-HSC mice.**

| Mouse ID | Treatment | % mCD45 | %<br>hCD45 | hCD45+ |         |       |      | %hCD4+ T | HIV-1 detection       |      |                    |
|----------|-----------|---------|------------|--------|---------|-------|------|----------|-----------------------|------|--------------------|
|          |           |         |            | %CD3   | %B cell | %CD4  | %CD8 |          | Withdrawl<br>(RT-PCR) | TZA  | HIV-1<br>clearance |
| 1001     | SECH      | 41.9    | 55.9       | 27.2   | 60.9    | 20.8  | 5.4  | 11.6     | HIV+                  | HIV+ | Not cleared        |
| 1002     | SECH      | 16.9    | 82.1       | 59.4   | 22.9    | 42.2  | 19.4 | 34.7     | HIV+                  | HIV+ | Not cleared        |
| 1003     | SECH      | 8.9     | 87.4       | 79.0   | 2.2     | 63.9  | 19.7 | 55.8     | HIV+                  | HIV+ | Not cleared        |
| 1004     | SECH      | 59.6    | 39.4       | 13.7   | 80.0    | 86.8  | 10.6 | 34.2     | HIV-                  | HIV- | HIV-               |
| 1005     | SECH      | 11.0    | 85.6       | 79.9   | 10.2    | 71.7  | 10.0 | 61.4     | HIV-                  | HIV- | HIV-               |
| 1006     | SECH      | 58.8    | 36.3       | 45.7   | 46.6    | 86.3  | 10.9 | 31.3     | HIV-                  | HIV- | HIV-               |
| 1007     | SECH      | 20.0    | 79.0       | 55.8   | 19.1    | 50.7  | 8.0  | 40.1     | HIV+                  | HIV+ | Not cleared        |
| 1008     | SECH      | 29.5    | 65.8       | 74.9   | 12.0    | 67.4  | 8.9  | 44.3     | HIV+                  | HIV+ | Not cleared        |
| 1009     | SECH      | 77.7    | 18.5       | 57.2   | 15.8    | 45.4  | 16.4 | 8.4      | HIV-                  | HIV- | HIV-               |
| 1010     | SECH      | 21.1    | 77.9       | 51.8   | 20.0    | 43.5  | 11.8 | 33.9     | HIV+                  | HIV+ | Not cleared        |
| 1011     | SECH      | 21.5    | 75.3       | 73.8   | 16.2    | 67.2  | 7.4  | 50.6     | HIV+                  | HIV+ | Not cleared        |
| 1012     | SECH      | 20.4    | 78.6       | 47.0   | 28.9    | 43.8  | 6.8  | 34.4     | HIV-                  | HIV- | HIV-               |
| 1013     | ART       | 77.1    | 22.9       | 3.6    | 92.9    | 100.0 | 0.0  | 22.9     | HIV+                  | HIV+ | Not cleared        |
| 1014     | ART       | 77.7    | 21.3       | 29.1   | 58.5    | 80.5  | 17.3 | 17.2     | HIV+                  | HIV+ | Not cleared        |
| 1015     | ART       | 83.9    | 16.1       | 1.6    | 88.2    | 50.0  | 40.0 | 8.1      | HIV+                  | HIV+ | Not cleared        |
| 1016     | ART       | 99.8    | 0.2        | 42.0   | 46.7    | 70.9  | 23.3 | 0.1      | HIV+                  | HIV+ | Not cleared        |
|          | Average   | 45.4    | 52.7       | 46.4   | 38.8    | 61.9  | 13.5 | 30.6     |                       |      |                    |
|          | SD        | 30.5    | 29.9       | 25.5   | 29.5    | 20.9  | 9.3  | 18.0     |                       |      |                    |

**Supplementary Table 3. Hu-HSC mice used for SECH+JQ-1 treatments for HIV-1 infections.**

| Mouse ID | SEX    | Treatment   | % mCD45 | % hCD45 | hCD45+  |      |      | hCD45+ |      | hCD45+CD3-CD19- |      |      | HIV-1 detection     |      |       |               |
|----------|--------|-------------|---------|---------|---------|------|------|--------|------|-----------------|------|------|---------------------|------|-------|---------------|
|          |        |             |         |         | %B cell | %CD3 | %NK  | %CD4   | %CD8 | %DC             | %M1  | %M2  | Withdrawal (RT-PCR) | TZA  | hmVOA | HIV clearance |
| 1301     | Male   | SECH        | 52.3    | 46.4    | 75.8    | 15.9 | 0.7  | 12.5   | 2.6  | 1.6             | 46.2 | 33.7 | HIV+                | HIV+ | N/A   | Not cleared   |
| 1302     | Male   | SECH        | 46.2    | 53.8    | 2.0     | 95.5 | 0.5  | 73.4   | 16.4 | 1.4             | 9.5  | 10.8 | HIV+                | HIV+ | N/A   | Not cleared   |
| 1303     | Male   | SECH        | 63.9    | 20.1    | 12.2    | 85.4 | 0.4  | 75.9   | 6.0  | 0.0             | 75.0 | 0.0  | HIV+                | HIV+ | HIV+  | Not cleared   |
| 1304     | Male   | SECH        | 46.0    | 52.2    | 8.6     | 87.4 | 0.8  | 71.8   | 8.2  | 11.1            | 16.7 | 61.1 | HIV+                | HIV+ | HIV+  | Not cleared   |
| 1305     | Female | SECH        | 91.1    | 8.9     | 22.8    | 65.8 | 2.4  | 51.8   | 12.3 | 4.7             | 33.7 | 25.0 | HIV+                | HIV+ | N/A   | Not cleared   |
| 1306     | Female | SECH        | 64.7    | 32.8    | 26.8    | 67.0 | 0.7  | 58.9   | 6.0  | 1.8             | 37.4 | 45.0 | HIV-                | HIV- | HIV-  | HIV-          |
| 1307     | Female | SECH        | 76.2    | 22.0    | 40.4    | 54.3 | 1.4  | 47.8   | 5.3  | 1.5             | 43.8 | 43.5 | HIV-                | HIV- | HIV-  | HIV-          |
| 1308     | Female | SECH        | 61.8    | 34.5    | 35.6    | 56.9 | 1.1  | 41.8   | 13.6 | 4.0             | 42.5 | 43.1 | HIV+                | HIV+ | HIV+  | Not cleared   |
| 1309     | Female | SECH        | 41.6    | 10.6    | 72.9    | 17.8 | 2.1  | 6.2    | 9.7  | 5.9             | 39.2 | 35.8 | HIV-                | HIV- | HIV-  | HIV-          |
| 1310     | Female | SECH        | 38.8    | 59.0    | 20.8    | 73.9 | 1.0  | 57.9   | 10.5 | 1.4             | 30.6 | 34.3 | HIV-                | HIV- | HIV-  | HIV-          |
| 1311     | Female | SECH + JQ-1 | 22.4    | 76.3    | 1.22    | 97.5 | 76.2 | 76.3   | 13.1 | 0.55            | 88   | 10.1 | HIV-                | HIV- | HIV-  | HIV-          |
| 1312     | Female | SECH + JQ-1 | 21.8    | 76.9    | 0.77    | 97.7 | 76.9 | 73.5   | 17.2 | 1.25            | 87.3 | 9.63 | HIV-                | HIV- | HIV-  | HIV-          |
| 1313     | Female | SECH + JQ-1 | 87.5    | 10.5    | 0.36    | 4.33 | 10.4 | 2.5    | 1.1  | 0               | 96.2 | 1.92 | HIV-                | HIV- | HIV-  | HIV-          |
| 1314     | Female | SECH + JQ-1 | 66      | 33.1    | 19      | 72.7 | 33.1 | 50.3   | 16.9 | 37.5            | 0    | 12.5 | HIV-                | HIV- | HIV-  | HIV-          |
| 1315     | Female | SECH + JQ-1 | 68.5    | 30.9    | 10.9    | 82.8 | 30.9 | 63.9   | 13.0 | 0               | 25   | 65.6 | HIV-                | HIV- | HIV-  | HIV-          |
| 1316     | Female | SECH + JQ-1 | 71      | 27.7    | 0.072   | 95.4 | 27.4 | 57.1   | 29.1 | 2.05            | 69.3 | 20.1 | HIV-                | HIV- | HIV-  | HIV-          |
| 1317     | Female | SECH + JQ-1 | 96.5    | 1.49    | 11.2    | 66.4 | 0.73 | 31.9   | 12.9 | 1.03            | 62.3 | 23.3 | HIV+                | HIV+ | HIV+  | Not cleared   |
| 1318     | Male   | SECH + JQ-1 | 61.6    | 36.6    | 12.4    | 82.1 | 36.6 | 67.4   | 9.9  | 13.3            | 20.5 | 97.9 | HIV+                | HIV+ | HIV+  | Not cleared   |
| 1319     | Male   | SECH + JQ-1 | 98.6    | 0.99    | 62.5    | 20   | 0.99 | 12.5   | 5.0  | 0               | 66.7 | 100  | HIV-                | HIV- | HIV-  | HIV-          |
| 1320     | Male   | SECH + JQ-1 | 23.7    | 75      | 0       | 99.5 | 75   | 76.1   | 20.1 | 33.3            | 27.7 | 78.8 | HIV-                | HIV- | HIV-  | HIV-          |
| 1321     | Male   | SECH + JQ-1 | 94.2    | 4.57    | 70.2    | 1.65 | 4.57 | 0.8    | 0.8  | 7.69            | 34.5 | 100  | HIV-                | HIV- | HIV-  | HIV-          |
| 1322     | Male   | SECH + JQ-1 | 29.2    | 69.6    | 1.91    | 96.1 | 69.6 | 77.5   | 14.3 | 16.7            | 19.7 | 88.9 | HIV+                | HIV+ | HIV+  | Not cleared   |
| 1323     | Male   | SECH + JQ-1 | 96.9    | 2.33    | 76.2    | 2.5  | 2.33 | 1.3    | 0.0  | 40              | 50   | 98.4 | HIV-                | HIV- | HIV-  | HIV-          |
| 1324     | Male   | pART        | 39.5    | 60.5    | 23.5    | 71.3 | 1.0  | 64.2   | 3.9  | 3.2             | 28.2 | 35.9 | HIV+                | HIV+ | N/A   | Not cleared   |
| 1325     | Female | pART        | 60.3    | 39.6    | 36.9    | 62.5 | 3.5  | 40.6   | 21.9 | 1.0             | 35.5 | 51.2 | HIV+                | HIV+ | N/A   | Not cleared   |
| 1326     | Female | pART        | 83.5    | 15.2    | 37.8    | 55.6 | 0.9  | 47.3   | 6.7  | 6.6             | 28.7 | 27.7 | HIV+                | HIV+ | N/A   | Not cleared   |
| 1327     | Female | pART        | 37.6    | 60.1    | 70.5    | 24.8 | 1.2  | 16.9   | 6.5  | 2.6             | 38.3 | 38.7 | HIV+                | HIV+ | N/A   | Not cleared   |
| Average  |        |             | 60.8    | 35.6    | 27.9    | 61.2 | 17.1 | 46.6   | 10.5 | 7.4             | 42.7 | 44.2 |                     |      |       |               |
| SD       |        |             | 24.4    | 24.7    | 26.7    | 32.6 | 26.7 | 26.6   | 7.0  | 11.5            | 24.5 | 31.8 |                     |      |       |               |
